# Supplementary material
Source: publisher site journal article supplement (https://www.dovepress.com/article/287382)
Supplement: Supplementary file 1 [file get_supplementary_file.php]

**Appendix. 1: 32 item checklist for consolidated criteria for reporting qualitative study (COREQ)**

**
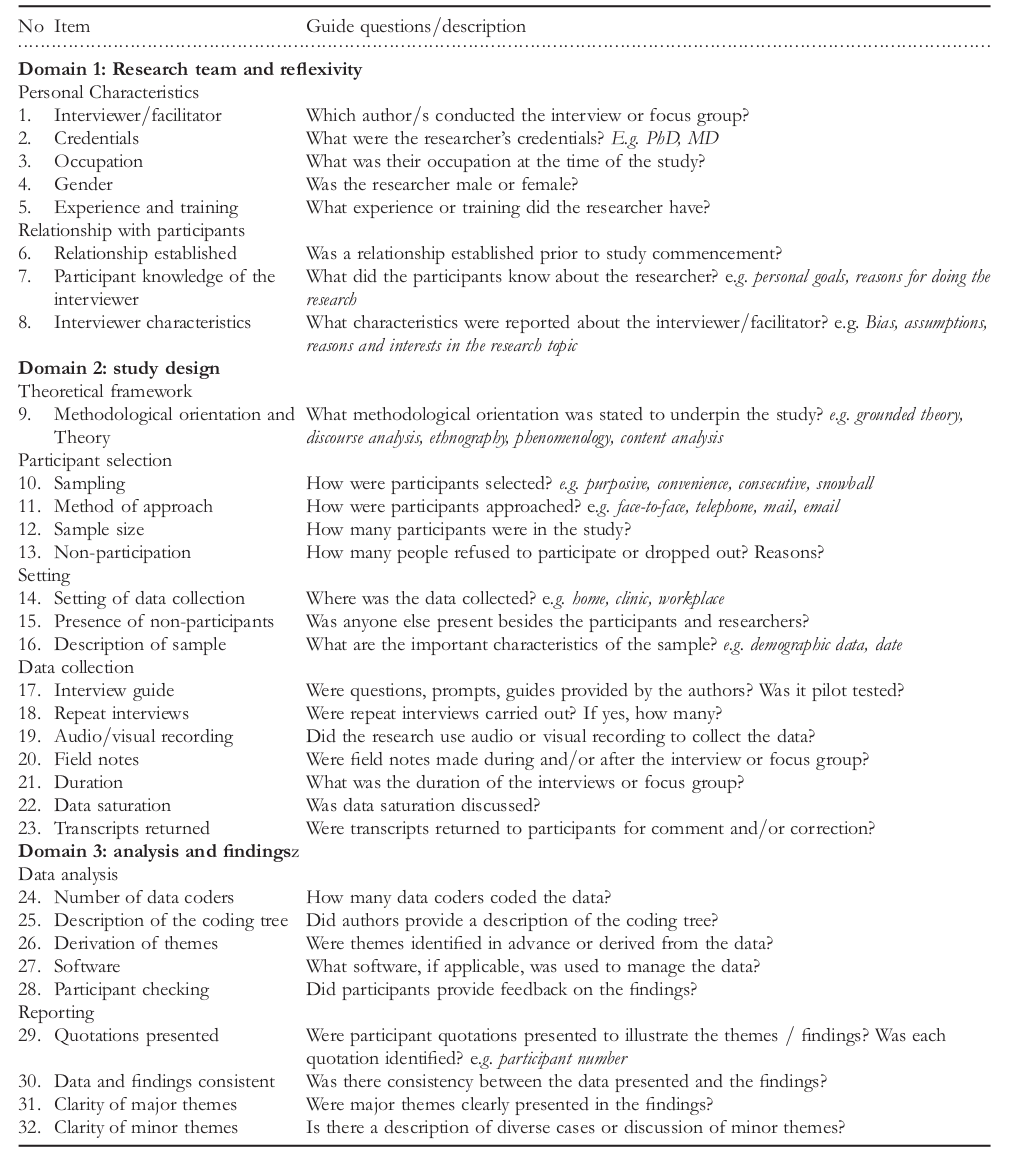
**

Note: Reproduced from Tong A, Sainsbury P, Craig J. Consolidated criteria for reporting qualitative research (COREQ): a 32-item checklist for interviews and focus groups. Int J Qual Health Care. 2007;19(6):349–357, by permission of Oxford University Press.1

References

1. Tong A, Sainsbury P, Craig J. Consolidated criteria for reporting qualitative research (COREQ): a 32-item checklist for interviews and focus groups. Int J Qual Health Care. 2007;19(6):349–357.  doi:10.1093/intqhc/mzm042
